# Supplementary material for: Improvement of the resistance performance of carbon/cyanate ester composites during vacuum electron radiation by reduced graphene oxide modified TiO2
Source: Royal Society of Chemistry journal article supplement (doi:10.1039/c5ra11113g), 2015-01-01
Supplement: c5ra11113g1.pdf [file c5ra11113g1.pdf]

## Supporting Information

# Improvement of the Resistance Performance of Carbon/Cyanate Ester Composites during Vacuum Electron Radiation by Reduced Graphene oxide Modified TiO<sub>2</sub>

Dequn PENG<sup>1</sup>, Wei QIN<sup>2\*</sup>, Xiaohong WU<sup>1\*</sup>, Jinzhu Wu<sup>1</sup>, Yangyang PAN<sup>3</sup>

*1. Department of Chemistry, 2. School of Materials Science and Engineering*

*Harbin Institute of Technology, Harbin, Heilongjiang 150001, P. R. China*

*3. Shanghai Institute of Spacecraft Equipment, Shanghai, 200240, P. R. China*

E-mail: [qinwei@hit.edu.cn](mailto:qinwei@hit.edu.cn), [wuxiaohong@hit.edu.cn](mailto:wuxiaohong@hit.edu.cn)

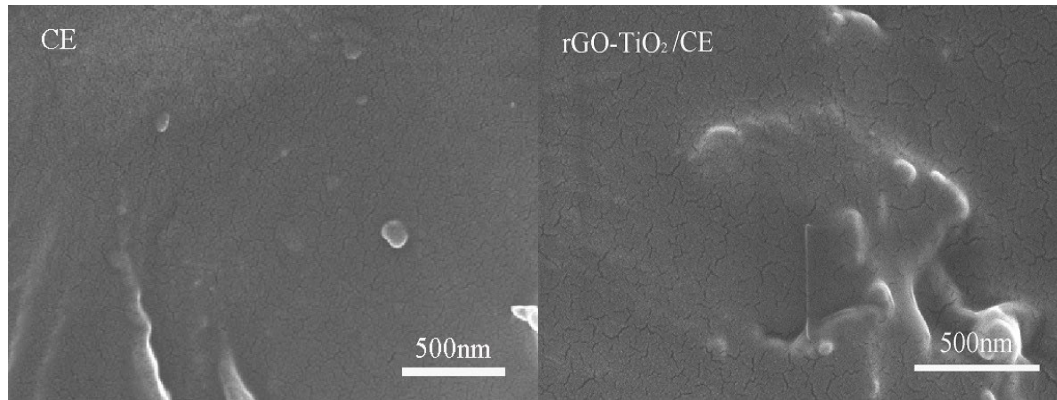

Fig. S1. SEM images of CE and GR-TiO<sub>2</sub>

Table S1 Influence of irradiation fluence on mass loss ratio.

| Fluence (e/cm <sup>2</sup> ) | Mass Loss Ratio (%) |                           |                               |
|------------------------------|---------------------|---------------------------|-------------------------------|
|                              | T700/CE             | T700/TiO <sub>2</sub> /CE | T700/rGO-TiO <sub>2</sub> /CE |
| 0                            | 0.0000 (0.0000)     | 0.0000 (0.0000)           | 0.0000 (0.0000)               |
| 1 × 10 <sup>15</sup>         | 0.0600 (0.0013)     | 0.0406 (0.0010)           | 0.0312 (0.0011)               |
| 5 × 10 <sup>15</sup>         | 0.0960 (0.0005)     | 0.0685 (0.0012)           | 0.0551 (0.0003)               |
| 1 × 10 <sup>16</sup>         | 0.1100 (0.0015)     | 0.0881 (0.0008)           | 0.0723 (0.0007)               |
| 2 × 10 <sup>16</sup>         | 0.1220 (0.0009)     | 0.1030 (0.0007)           | 0.0860 (0.0006)               |

Values in bracket are the standard deviation of the results
